# Supplementary material for: Ionic liquid–water mixtures and ion gels as electrolytes for organic electrochemical transistors
Source: Royal Society of Chemistry journal article supplement (doi:10.1039/c5tc00712g), 2015-01-01
Supplement: c5tc00712g1.pdf [file c5tc00712g1.pdf]

## Electronic Supplementary Information

### Ionic liquid/water mixtures and ion gels as electrolytes for organic electrochemical transistors

Zhihui Yi,<sup>a</sup> Giovanniantonio Natale,<sup>a</sup> Prajwal Kumar,<sup>a</sup> Eduardo Di Mauro,<sup>b</sup> Marie-Claude Heuzey,<sup>a</sup> Francesca Soavi,<sup>c</sup> Iryna I. Perepichka,<sup>d</sup> Sunil K. Varshney,<sup>d</sup> Clara Santato<sup>\*b</sup>, Fabio Cicoira<sup>\*a</sup>

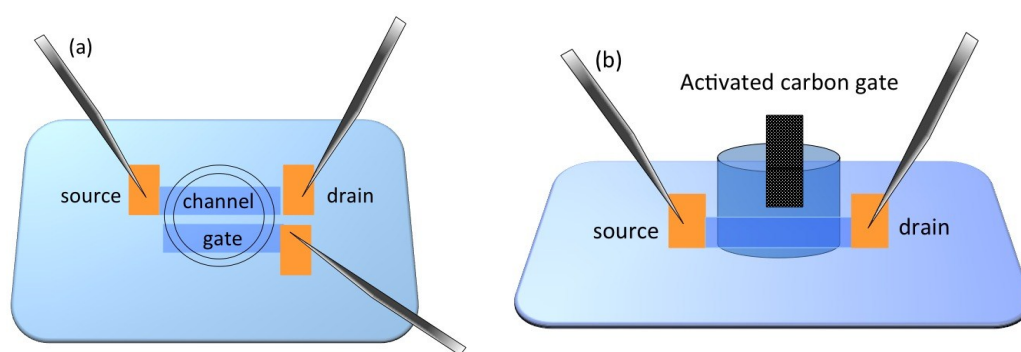

**Fig. ES11** Device structure of the OEETs used in this work. Side view of an OEET employing a planar PEDOT:PSS gate (a). The distance between the parallel PEDOT:PSS stripes (channel and gate electrode) is 0.2 mm. Top view of an OEET employing an activated carbon gate (b). The gate is immersed into the electrolyte confined within a glass tube (cloning cylinder).

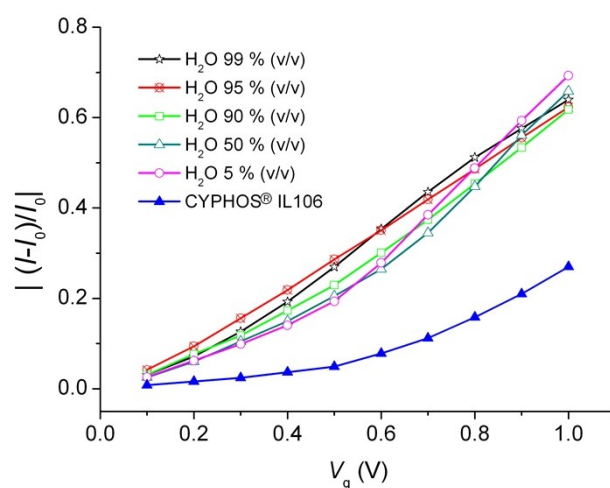

**Fig. ES12:** Current modulation  $|I-I_0|/I_0$  versus  $V_g$  for OEETs using as the electrolyte Cyphos® IL 106/H<sub>2</sub>O mixtures at different ratios, as specified in the legend.  $V_d = -0.2$  V.

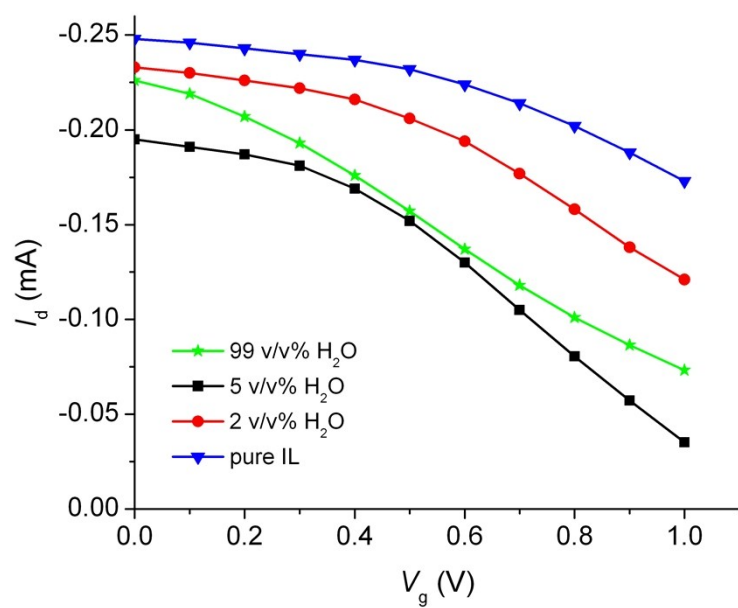

**Fig. ESI3:** Transfer characteristics of OECTs using as the electrolyte pure Cyphos® IL106 and Cyphos® IL 106/ $H_2O$  mixtures.  $V_d = -0.2$  V. See main text for details.

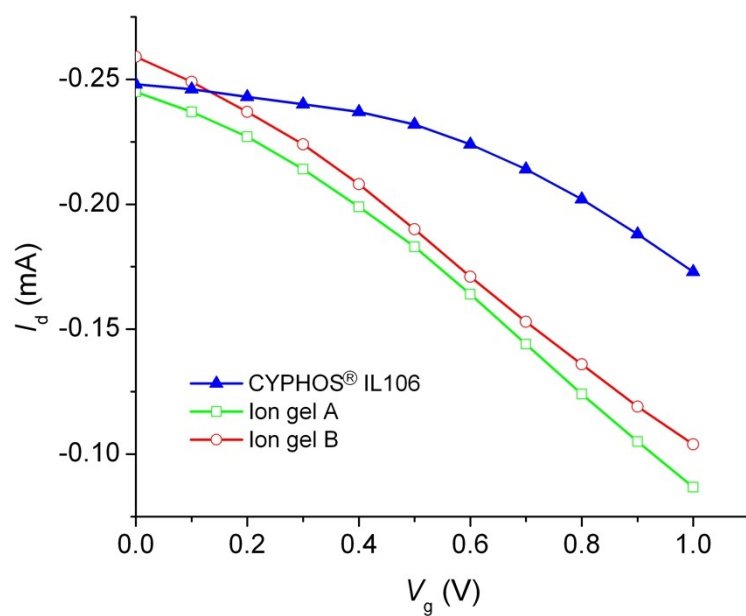

**Fig. ESI4:** Transfer characteristics of OECTs using as the electrolyte pure Cyphos® IL106 and ion gels A and B.  $V_d = -0.2$  V. See main text for details.

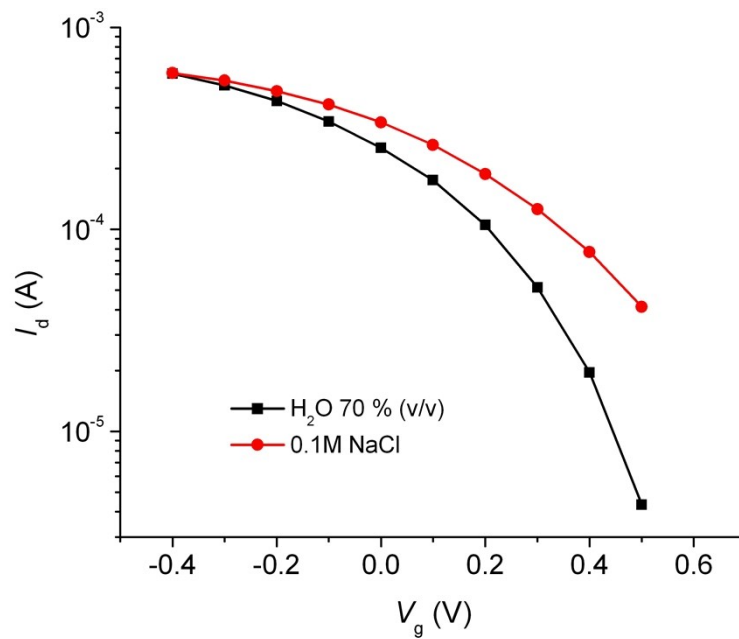

**Fig. ESI5:** Transfer curves of PEDOT:PSS OECTs making use of activated carbon as the gate electrode and Cyphos® IL106/ $\text{H}_2\text{O}$  at 70% v/v and 0.1 M NaCl aqueous solutions as the gating media.  $V_d = -0.5$  V.

**Table ESI1.** Ionic conductivity of Cyphos® IL 106/H<sub>2</sub>O mixtures at different v/v ratios measured with a conductivity meter. Values for pure Cyphos® IL 106 and Cyphos® IL 106/H<sub>2</sub>O mixture at H<sub>2</sub>O 99% (v/v) have been validated by Electrochemical Impedance Spectroscopy (EIS). The measurements have been carried out at 22 °C.

| <b>H<sub>2</sub>O % (v/v)</b> | <b>Ionic conductivity (<math>\sigma</math>) by conductivity meter (mS/cm)</b> |
|-------------------------------|-------------------------------------------------------------------------------|
| Pure IL                       | 0.06                                                                          |
| 2%                            | 0.1                                                                           |
| 5%                            | 0.3                                                                           |
| 10%                           | 1                                                                             |
| 30%                           | 6                                                                             |
| 50%                           | 10                                                                            |
| 70%                           | 12                                                                            |
| 90%                           | 8                                                                             |
| 99%                           | 1.5                                                                           |

**Table ESI2.** ON/OFF ratios of OECTs making use of an activated carbon gates and Cyphos® IL 106/H<sub>2</sub>O mixtures as electrolytes.

| <b>H<sub>2</sub>O % (v/v)</b> | <b>ON/OFF ratio</b> |
|-------------------------------|---------------------|
| 0 (Pure Cyphos® IL 106)       | 40                  |
| 2                             | 100                 |
| 5                             | 2500                |
| 10                            | 5000                |
| 30                            | 1200                |
| 50                            | 700                 |
| 70                            | 70                  |
| 90                            | 60                  |
| 99                            | 40                  |
